# Supplementary material for: A self-descaling Janus nanofibrous evaporator enabled by a “moving interface” for durable solar-driven desalination of hypersaline water
Source: Royal Society of Chemistry journal article supplement (doi:10.1039/d2ta05555d), 2022-01-01
Supplement: d2ta05555d1.pdf [file d2ta05555d1.pdf]

## Electronic Supporting Information

# Self-Descaling Janus Nanofibrous Evaporator Enabled by A “Moving Interface” for Durable Solar-Driven Desalination of Hypersaline Water

Hao-Nan Li<sup>a,b</sup>, Hao-Cheng Yang<sup>c\*</sup>, Cheng-Ye Zhu<sup>a,b</sup>, Jian Wu<sup>d</sup>, Andreas Greiner<sup>e\*</sup>, Zhi-Kang Xu<sup>a,b\*</sup>

<sup>a</sup> MOE Key Laboratory of Macromolecular Synthesis and Functionalization, and Key Laboratory of Adsorption and Separation Materials & Technologies of Zhejiang Province, Department of Polymer Science and Engineering, Zhejiang University, Hangzhou, 310027, China

<sup>b</sup> The “Belt and Road” Sino-Portugal Joint Lab on Advanced Materials, International Research Center for X Polymers, Zhejiang University, Hangzhou, 310027, China

<sup>c</sup> School of Chemical Engineering and Technology, Sun Yat-Sen University, Southern Marine Science and Engineering Guangdong Laboratory (Zhuhai), No.2 Daxue road, Tangjiawan, Zhuhai 519082, China

<sup>d</sup> Department of Chemistry, Zhejiang University, Hangzhou, 310027, China

<sup>e</sup> Macromolecular Chemistry and Bavarian Polymer Institute, University of Bayreuth, Universitätsstrasse 30, Bayreuth 95440, German

\* Correspondence author:

E-mail addresses: yanghch8@mail.sysu.edu.cn (H.-C. Yang)

greiner@uni-bayreuth.de (A. Greiner)

xuzk@zju.edu.cn (Z.-K. Xu)

## Results and discussion

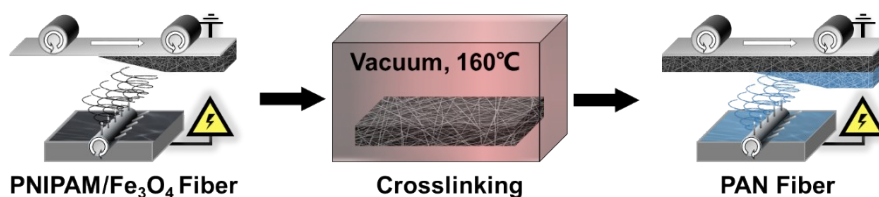

**Fig. S1** Schematic diagram of the fabrication process of SJE.

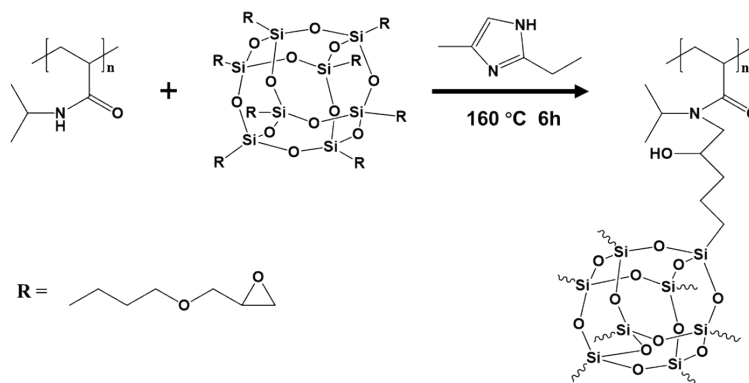

**Fig. S2** Scheme of crosslinking reaction of PNIPAM and POSS at 160 °C.

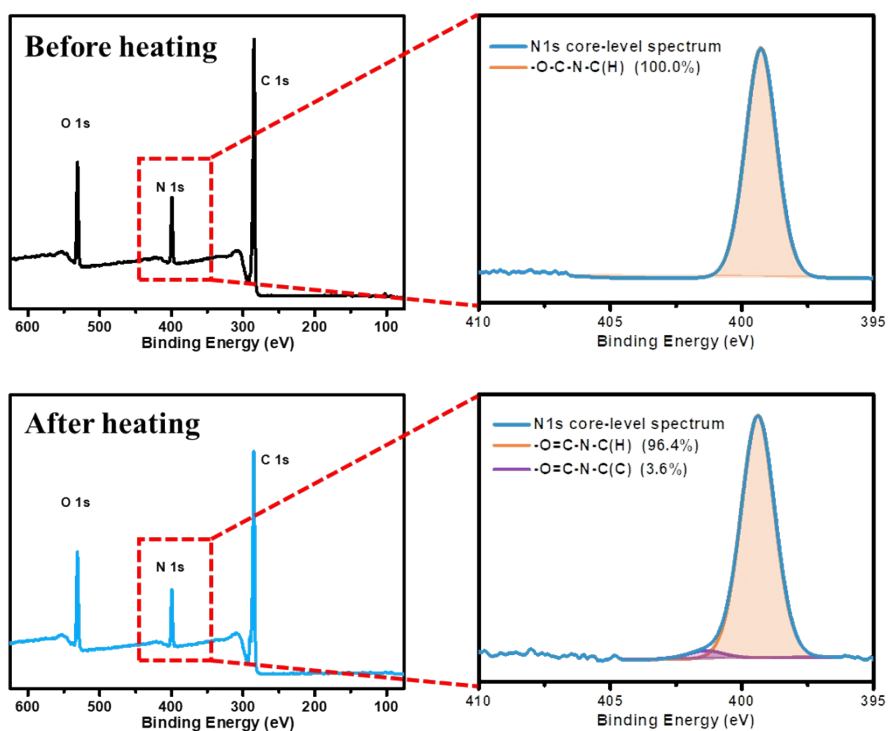

**Fig. S3** XPS survey spectra and N 1s core-level spectra of PNIPAM/Fe<sub>3</sub>O<sub>4</sub> layers before and after the heating process.

The N 1s core-level spectra of the PNIPAM/Fe<sub>3</sub>O<sub>4</sub> layers exhibit a newly-emerged peak located at 401.3 eV after the heating process, which is attributed to O=C-N-C(C) groups of

cross-linked PNIPAM. In addition, the main characteristic peak at 399.3 eV belongs to O=C–N–C(H) groups of PNIPAM.<sup>1</sup> Based on the peak area, it can be calculated that there are 3.6% of the repeating units of PNIPAM participated in the cross-linking reaction.

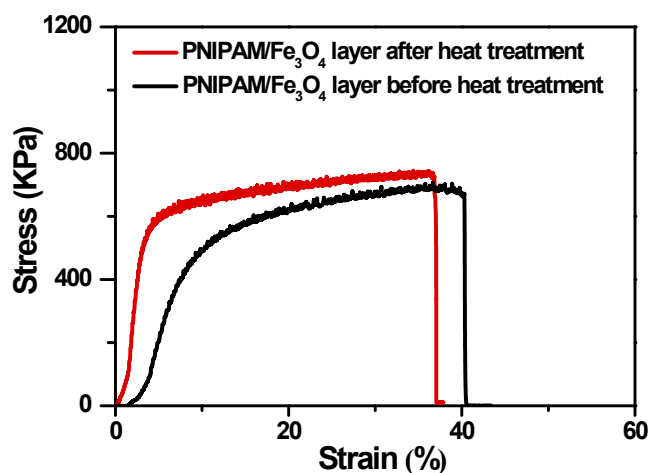

**Fig. S4** Stress–strain curves of the PNIPAM/Fe<sub>3</sub>O<sub>4</sub> layer before and after heat treatment.

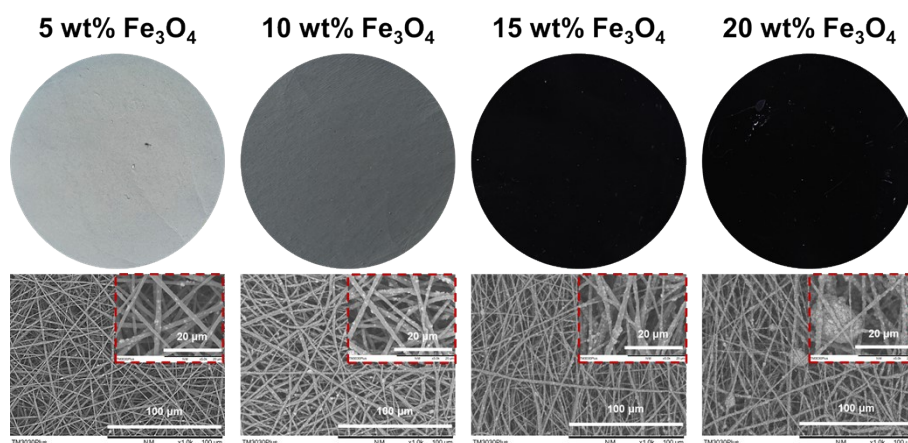

**Fig. S5** Digital images (up) and SEM images (down) of the PNIPAM/Fe<sub>3</sub>O<sub>4</sub> nanofibrous membrane with different Fe<sub>3</sub>O<sub>4</sub> amounts.

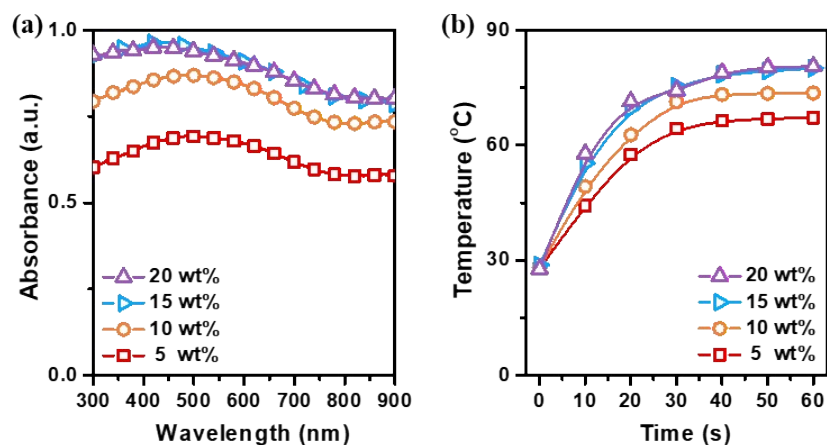

**Fig. S6** (a) Light absorption spectra and (b) temperature elevation curves of the PNIPAM/Fe<sub>3</sub>O<sub>4</sub> nanofibrous membrane with different Fe<sub>3</sub>O<sub>4</sub> amounts.

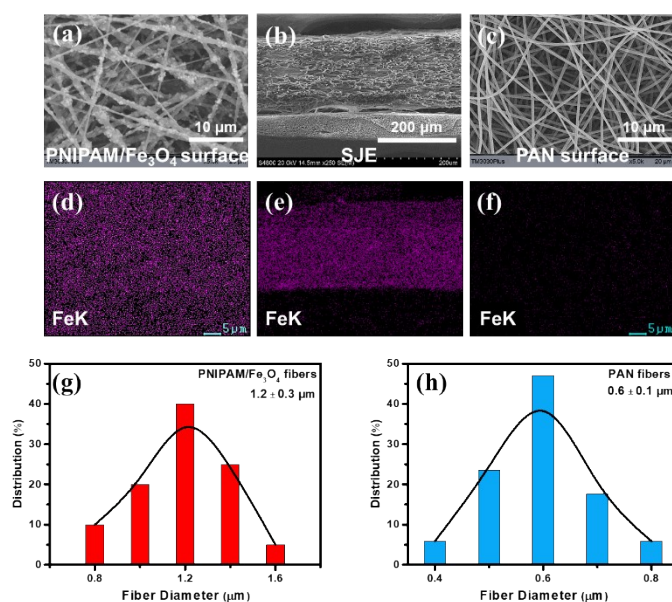

**Fig. S7** SEM images of (a) PNIPAM/Fe<sub>3</sub>O<sub>4</sub> surface, (b) cross-section and (c) PAN surface of SJE and corresponding EDX element mapping of Fe of (d) PNIPAM/Fe<sub>3</sub>O<sub>4</sub> surface, (e) cross-section and (f) PAN surface. Average fiber diameter distribution of (g) PNIPAM/Fe<sub>3</sub>O<sub>4</sub> fibers and (h) PAN fibers.

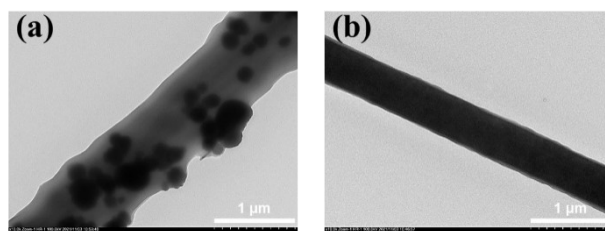

**Fig. S8** TEM images of (a) PNIPAM/Fe<sub>3</sub>O<sub>4</sub> fibers, (b) PAN fibers. The PNIPAM/Fe<sub>3</sub>O<sub>4</sub> fibers with micro-structured roughness can enhance the multi-scattering of incident light, which

is beneficial to improve the light absorption of evaporators.

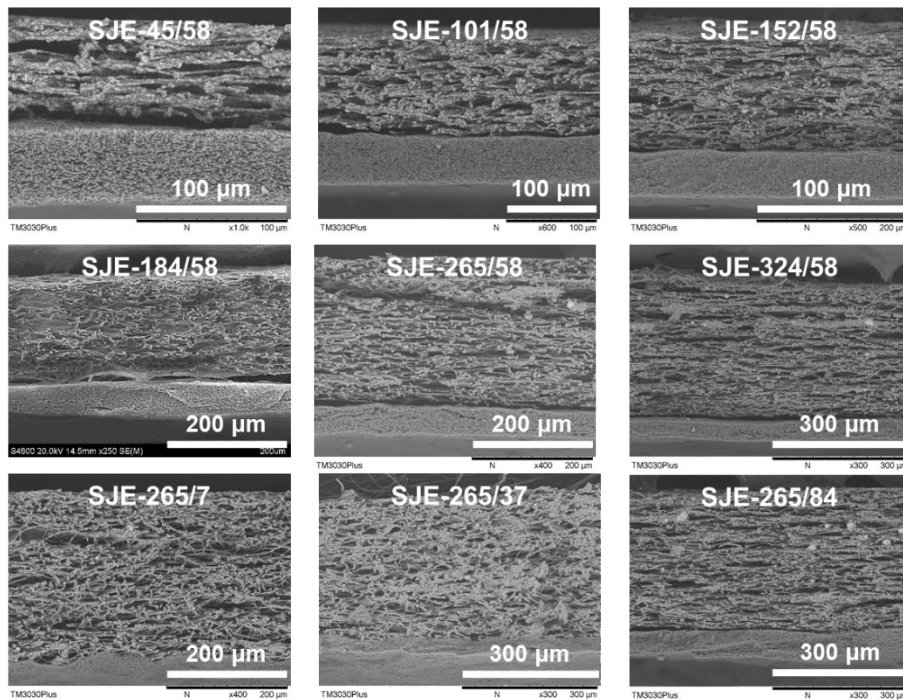

**Fig. S9** Corss-section images of SJE.

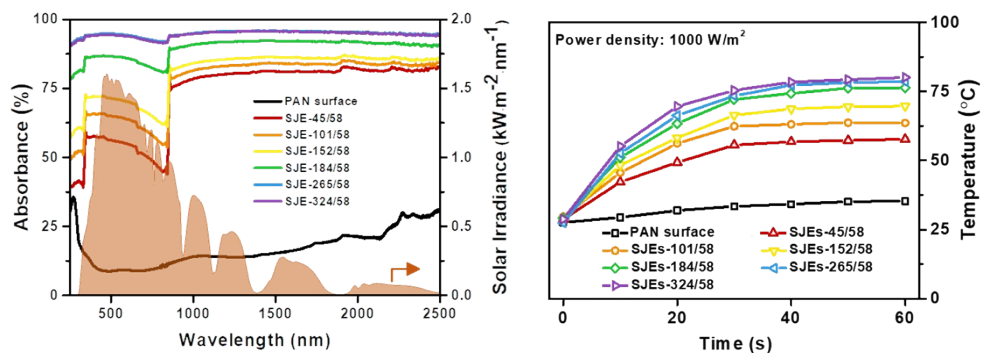

**Fig. S10** Full-wave band absorption spectra (left) and dynamic temperature curves (right) of the two surfaces of SJE as a function of time under simulated sunlight irradiation (1000 W/m<sup>2</sup>).



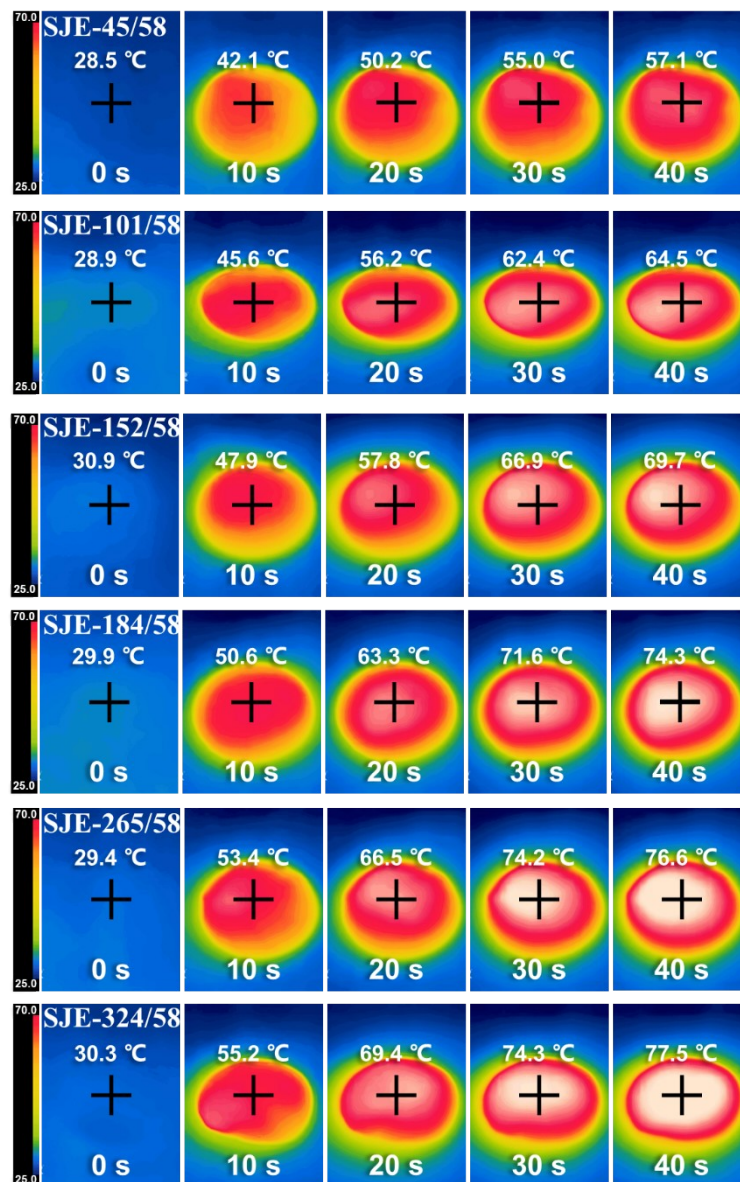

**Fig. S11** Infrared images of the PNIPAM/Fe<sub>3</sub>O<sub>4</sub> surface of SJE under 1-sun irradiation.

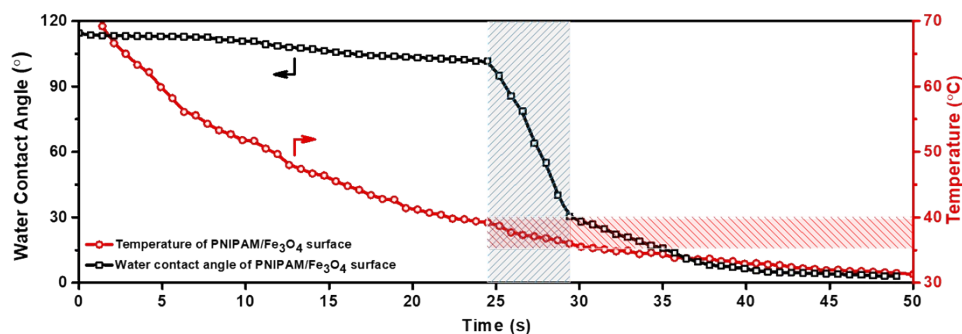

**Fig. S12** Dynamic surface temperature and corresponding water contact angle of the PNIPAM/Fe<sub>3</sub>O<sub>4</sub> surface of SJE-265/58 during cooling process.

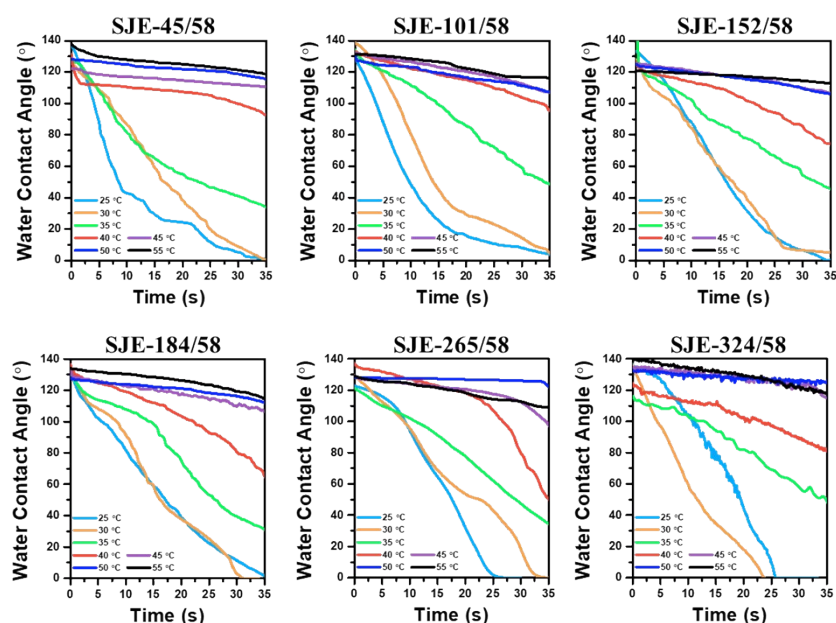

**Fig. S13** Dynamic water contact angle of the PNIPAM/Fe<sub>3</sub>O<sub>4</sub> surface of SJEs under different temperature.

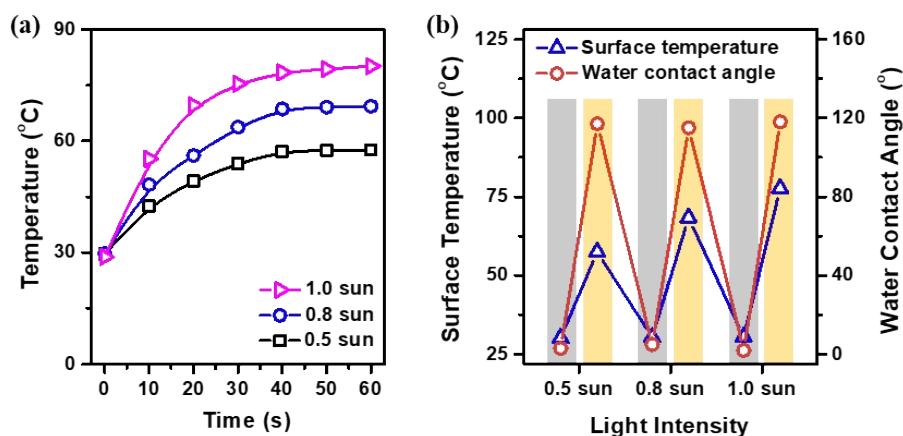

**Fig. S14** (a) Temperature elevation curves of the PNIPAM/Fe<sub>3</sub>O<sub>4</sub> surface of SJE with the light intensity (0.5 sun, 0.8 sun and 1.0 sun). (b) Static contact angle and surface temperature on the PNIPAM/Fe<sub>3</sub>O<sub>4</sub> surface of SJE at different light conditions.

**Table S1** Water contact angle (WCA) and surface temperature of the PNIPAM/Fe<sub>3</sub>O<sub>4</sub> surface during 100 light-on/light-off cycles.

| Cycle Number | Light Condition | Temperature (°C) | WCA (°) |
|--------------|-----------------|------------------|---------|
| 1            | off             | 26               | 6       |
|              | on              | 75               | 115     |
| 2            | off             | 31               | 4       |
|              | on              | 78               | 111     |
| 3            | off             | 30               | 8       |

|    |     |    |     |
|----|-----|----|-----|
|    | on  | 77 | 114 |
| 4  | off | 30 | 7   |
|    | on  | 78 | 116 |
| 5  | off | 29 | 6   |
|    | on  | 74 | 112 |
| 6  | off | 31 | 4   |
|    | on  | 76 | 117 |
| 7  | off | 30 | 6   |
|    | on  | 77 | 114 |
| 8  | off | 31 | 6   |
|    | on  | 72 | 116 |
| 9  | off | 30 | 5   |
|    | on  | 74 | 113 |
| 10 | off | 31 | 9   |
|    | on  | 76 | 111 |
| 11 | off | 30 | 8   |
|    | on  | 76 | 114 |
| 12 | off | 31 | 6   |
|    | on  | 78 | 114 |
| 13 | off | 30 | 8   |
|    | on  | 76 | 116 |
| 14 | off | 29 | 8   |
|    | on  | 77 | 113 |
| 15 | off | 29 | 11  |
|    | on  | 74 | 109 |
| 16 | off | 30 | 7   |
|    | on  | 73 | 117 |
| 17 | off | 31 | 5   |
|    | on  | 78 | 114 |
| 18 | off | 29 | 7   |
|    | on  | 77 | 111 |
| 19 | off | 31 | 4   |
|    | on  | 73 | 117 |
| 20 | off | 32 | 7   |
|    | on  | 76 | 114 |
| 21 | off | 30 | 8   |
|    | on  | 74 | 113 |
| 22 | off | 31 | 5   |
|    | on  | 77 | 115 |
| 23 | off | 32 | 3   |
|    | on  | 78 | 117 |
| 24 | off | 31 | 6   |
|    | on  | 74 | 111 |
| 25 | off | 30 | 3   |
|    | on  | 76 | 112 |
| 26 | off | 31 | 6   |
|    | on  | 77 | 114 |



|    |     |    |     |
|----|-----|----|-----|
| 27 | off | 31 | 8   |
|    | on  | 75 | 113 |
| 28 | off | 32 | 5   |
|    | on  | 74 | 111 |
| 29 | off | 31 | 7   |
|    | on  | 76 | 116 |
| 30 | off | 31 | 7   |
|    | on  | 77 | 111 |
| 31 | off | 30 | 5   |
|    | on  | 78 | 113 |
| 32 | off | 31 | 7   |
|    | on  | 73 | 114 |
| 33 | off | 30 | 0   |
|    | on  | 77 | 112 |
| 34 | off | 30 | 2   |
|    | on  | 78 | 115 |
| 35 | off | 29 | 3   |
|    | on  | 75 | 118 |
| 36 | off | 31 | 0   |
|    | on  | 74 | 116 |
| 37 | off | 31 | 5   |
|    | on  | 77 | 114 |
| 38 | off | 31 | 7   |
|    | on  | 75 | 111 |
| 39 | off | 30 | 2   |
|    | on  | 76 | 117 |
| 40 | off | 31 | 8   |
|    | on  | 77 | 109 |
| 41 | off | 30 | 2   |
|    | on  | 75 | 117 |
| 42 | off | 31 | 4   |
|    | on  | 77 | 114 |
| 43 | off | 31 | 1   |
|    | on  | 74 | 117 |
| 44 | off | 30 | 0   |
|    | on  | 77 | 112 |
| 45 | off | 31 | 5   |
|    | on  | 74 | 114 |
| 46 | off | 30 | 8   |
|    | on  | 77 | 116 |
| 47 | off | 31 | 4   |
|    | on  | 75 | 115 |
| 48 | off | 30 | 3   |
|    | on  | 77 | 117 |
| 49 | off | 31 | 8   |
|    | on  | 75 | 112 |
| 50 | off | 30 | 3   |

|    |     |    |     |
|----|-----|----|-----|
|    | on  | 76 | 112 |
| 51 | off | 31 | 4   |
|    | on  | 77 | 115 |
| 52 | off | 31 | 2   |
|    | on  | 76 | 111 |
| 53 | off | 30 | 7   |
|    | on  | 74 | 115 |
| 54 | off | 30 | 1   |
|    | on  | 77 | 116 |
| 55 | off | 30 | 7   |
|    | on  | 76 | 116 |
| 56 | off | 30 | 4   |
|    | on  | 76 | 117 |
| 57 | off | 31 | 0   |
|    | on  | 76 | 116 |
| 58 | off | 31 | 7   |
|    | on  | 74 | 112 |
| 59 | off | 31 | 3   |
|    | on  | 77 | 115 |
| 60 | off | 31 | 5   |
|    | on  | 75 | 118 |
| 61 | off | 31 | 7   |
|    | on  | 76 | 111 |
| 62 | off | 31 | 2   |
|    | on  | 74 | 114 |
| 63 | off | 31 | 0   |
|    | on  | 77 | 112 |
| 64 | off | 31 | 5   |
|    | on  | 73 | 113 |
| 65 | off | 30 | 10  |
|    | on  | 75 | 113 |
| 66 | off | 30 | 6   |
|    | on  | 74 | 114 |
| 67 | off | 31 | 3   |
|    | on  | 77 | 112 |
| 68 | off | 30 | 0   |
|    | on  | 78 | 111 |
| 69 | off | 31 | 7   |
|    | on  | 76 | 118 |
| 70 | off | 31 | 6   |
|    | on  | 77 | 115 |
| 71 | off | 30 | 2   |
|    | on  | 76 | 117 |
| 72 | off | 31 | 0   |
|    | on  | 74 | 111 |
| 73 | off | 31 | 5   |
|    | on  | 78 | 113 |

|    |     |    |     |
|----|-----|----|-----|
| 74 | off | 30 | 8   |
|    | on  | 77 | 119 |
| 75 | off | 31 | 3   |
|    | on  | 73 | 108 |
| 76 | off | 31 | 4   |
|    | on  | 78 | 115 |
| 77 | off | 31 | 3   |
|    | on  | 72 | 116 |
| 78 | off | 31 | 0   |
|    | on  | 74 | 117 |
| 79 | off | 29 | 4   |
|    | on  | 71 | 116 |
| 80 | off | 30 | 7   |
|    | on  | 71 | 113 |
| 81 | off | 29 | 3   |
|    | on  | 74 | 112 |
| 82 | off | 28 | 7   |
|    | on  | 73 | 114 |
| 83 | off | 30 | 3   |
|    | on  | 73 | 118 |
| 84 | off | 30 | 1   |
|    | on  | 71 | 119 |
| 85 | off | 29 | 6   |
|    | on  | 76 | 117 |
| 86 | off | 30 | 6   |
|    | on  | 73 | 113 |
| 87 | off | 31 | 0   |
|    | on  | 77 | 116 |
| 88 | off | 29 | 3   |
|    | on  | 74 | 117 |
| 89 | off | 30 | 5   |
|    | on  | 76 | 114 |
| 90 | off | 31 | 11  |
|    | on  | 73 | 118 |
| 91 | off | 30 | 4   |
|    | on  | 78 | 112 |
| 92 | off | 29 | 7   |
|    | on  | 73 | 116 |
| 93 | off | 31 | 0   |
|    | on  | 78 | 113 |
| 94 | off | 30 | 6   |
|    | on  | 77 | 111 |
| 95 | off | 29 | 8   |
|    | on  | 74 | 116 |
| 96 | off | 31 | 6   |
|    | on  | 76 | 113 |
| 97 | off | 32 | 7   |

|     |     |    |     |
|-----|-----|----|-----|
|     | on  | 77 | 111 |
| 98  | off | 31 | 9   |
|     | on  | 74 | 114 |
| 99  | off | 34 | 4   |
|     | on  | 77 | 112 |
| 100 | off | 30 | 12  |
|     | on  | 72 | 114 |

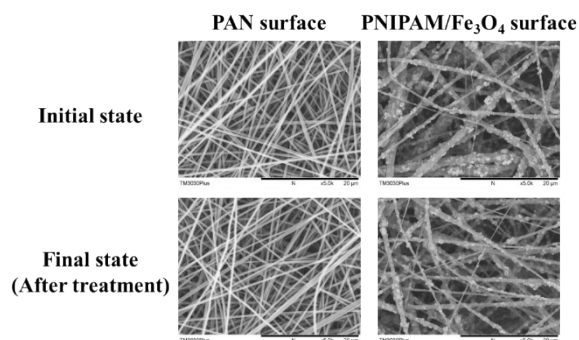

**Fig. S15** SEM images of the PAN surface and the PNIPAM/Fe<sub>3</sub>O<sub>4</sub> surface of SJE-265/58 before and after cycling test.

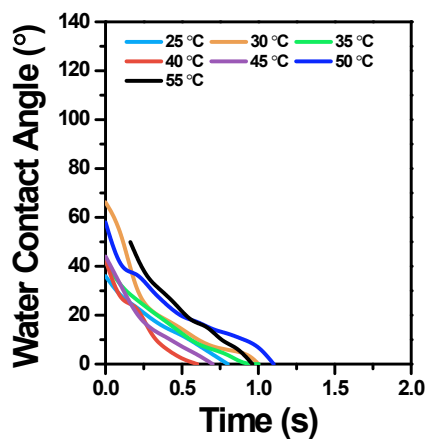

**Fig. S16** Dynamic water contact angle of the PAN surface of SJE-265/58 under different temperature.

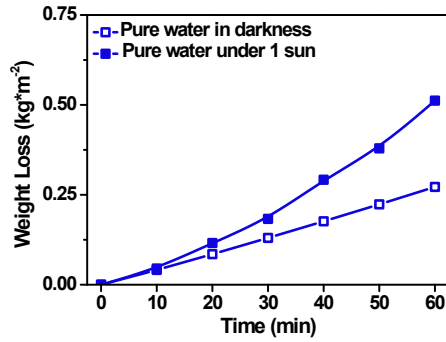

Fig. S17 Mass loss of water over time without SJE under different light conditions.

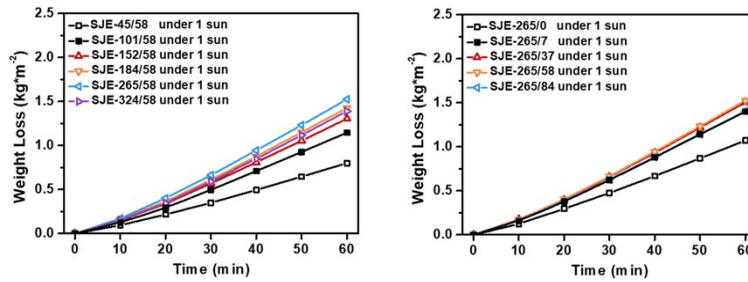

Fig. S18 Mass loss of water over time using different SJEs under 1-sun irradiation.

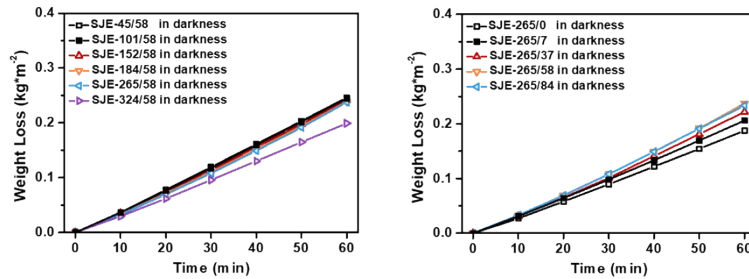

Fig. S19 Mass loss of water over time using different SJEs in darkness.

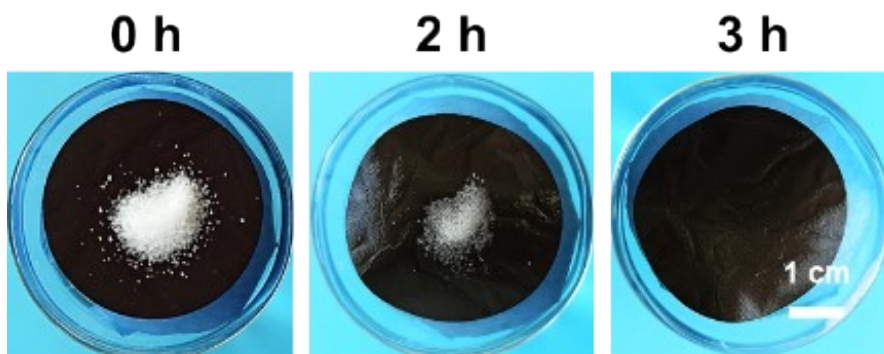

Fig. S20 Photographs showing the capability of self-descaling property by adding 1.5 g NaCl salt on the top surface of SJE.

**Table S2** Conductivity of NaCl solution with different NaCl concentration and collected condensed water. The desalination experiments were conducted using the optimized SJE under 1-sun irradiation.

| NaCl concentration | Feed ( $\cdot 10^3 \mu\text{S}/\text{cm}$ ) | Condensed water ( $\mu\text{S}/\text{cm}$ ) |
|--------------------|---------------------------------------------|---------------------------------------------|
| 3.5 wt%            | $55.4 \pm 2.1$                              | $12.3 \pm 0.5$                              |
| 10.0 wt%           | $135.2 \pm 3.6$                             | $11.7 \pm 0.8$                              |
| 15.0 wt%           | $182.1 \pm 5.2$                             | $13.6 \pm 1.1$                              |
| 20.0 wt%           | $217.4 \pm 7.2$                             | $12.7 \pm 1.8$                              |
| 25.0 wt%           | $246.3 \pm 9.3$                             | $14.8 \pm 1.1$                              |

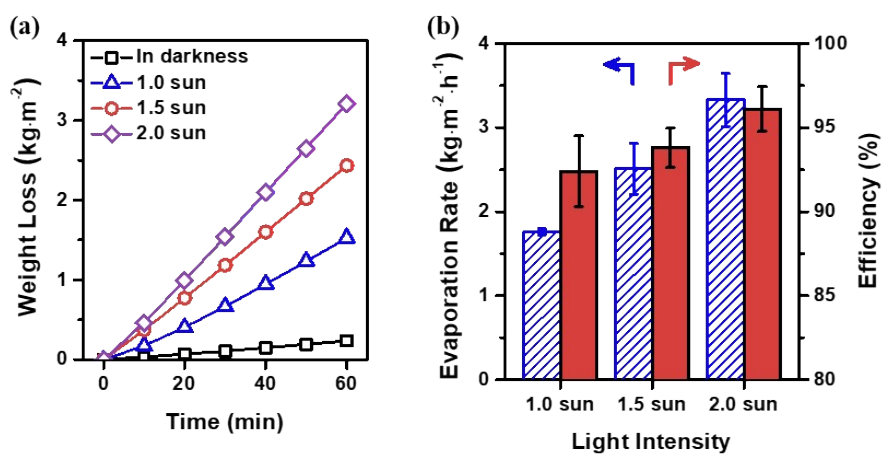

**Fig. S21** (a) Mass loss curves, (b) water evaporation rate and corresponding efficiency of SJE under different solar intensity.



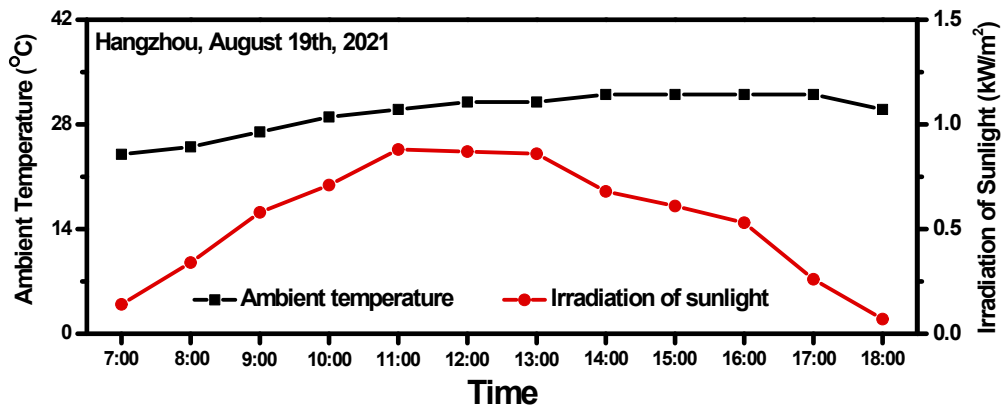

**Fig. S22** Ambient temperature and irradiation of sunlight at different times in the actual outdoor experiment.

**Table S3** Evaporation rates ( $\text{kg}\cdot\text{m}^{-2}\cdot\text{h}^{-1}$ ) of different evaporators under 1-sun irradiation reported in the literatures

| Materials                                                             | NaCl concentration in brine (wt%) |      |      |      |      | Reference |
|-----------------------------------------------------------------------|-----------------------------------|------|------|------|------|-----------|
|                                                                       | 3.5                               | 10   | 15   | 20   | 25   |           |
| Soot-coated Janus evaporator                                          | 1.31                              | /    | /    | 1.28 | /    | 2         |
| Hydroxyapatite nanowires/carbon nanotubes photothermal paper          | 1.09                              | /    | /    | /    | /    | 3         |
| Janus vertically oriented porous membrane                             | 1.58                              | /    | /    | /    | 0.82 | 4         |
| Laser induced graphene/oxidized laser induced graphene Janus membrane | 1.51                              | /    | /    | /    | /    | 5         |
| Janus evaporator with low tortuosity pore structure                   | 1.24                              | 1.22 | 1.21 | /    | /    | 6         |
| Vertically aligned Janus MXene aerogel                                | 1.46                              | 1.41 | 1.44 | 1.42 | /    | 7         |
| Copper-zinc-tin-selenide assembled membrane                           | 1.53                              | /    | /    | /    | /    | 8         |

|                                                                                             |             |             |             |             |             |                  |
|---------------------------------------------------------------------------------------------|-------------|-------------|-------------|-------------|-------------|------------------|
| Hydrophilic/hydrophobic nanoporous double layer evaporator                                  | 1.66        | /           | /           | /           | /           | 9                |
| Janus evaporator with self-recovering surface hydrophobicity                                | 1.38        | 1.35        | /           | /           | /           | 10               |
| W <sub>18</sub> O <sub>49</sub> @PDMS mesocrystal membrane                                  | 1.15        | /           | /           | /           | /           | 11               |
| Si/PPy-PVA sponge                                                                           | 1.41        | /           | /           | /           | 1.35        | 12               |
| Hierarchical Porous SWCNT Stringed Carbon Polyhedrons and PSS Threaded MOF Bilayer Membrane | 1.38        | /           | /           | /           | /           | 13               |
| SWNT/AuNR Janus evaporator                                                                  | 1.85        | /           | /           | /           | /           | 14               |
| PVDF-ATO/PAN nanofiber membrane                                                             | 0.93        | /           | /           | /           | /           | 15               |
| PDMS/MWCNT/PVDF composite membrane                                                          | 0.65        | /           | /           | /           | /           | 16               |
| PVDF-HFP Janus evaporator                                                                   | 1.29        | /           | /           | /           | /           | 17               |
| Fe <sub>3</sub> O <sub>4</sub> /PVDF-HFP photothermal membrane                              | 0.97        | /           | /           | /           | 1.1         | 18               |
| <b>SJE</b>                                                                                  | <b>1.71</b> | <b>1.64</b> | <b>1.54</b> | <b>1.49</b> | <b>1.44</b> | <b>This work</b> |

## References

- 1 J. Wang, A. Sutti, X. Wang and T. Lin, *Soft Matter*, 2011, **7**, 4364.
- 2 G. Li, W.-C. Law and K. C. Chan, *Green Chem.*, 2018, **20**, 3689–3695.
- 3 F. Peng, J. Xu, X. Bai, G. Feng, X. Zeng, M. R. I. Raihan and H. Bao, *Sol. Energ. Mat. Sol. C.*, 2021, **221**, 110910.
- 4 Z.-C. Xiong, Y.-J. Zhu, D.-D. Qin, F.-F. Chen and R.-L. Yang, *Small*, 2018, **14**, 1803387.
- 5 H.-H. Yu, L.-J. Yan, Y.-C. Shen, S.-Y. Chen, H.-N. Li, J. Yang and Z.-K. Xu, *Research*, 2020, **2020**, 3241758.
- 6 D.-D. Han, Z.-D. Chen, J.-C. Li, J.-W. Mao, Z.-Z. Jiao, W. Wang, W. Zhang, Y.-L. Zhang, and H.-B. Sun, *ACS Appl. Mater. Interfaces*, 2020, **12**, 25435–25443.
- 7 R. Hu, J. Zhang, Y. Kuang, K. Wang, X. Cai, Z. Fang, W. Huang, G. Chen and Z. Wang, *J. Mater. Chem. A*, 2019, **7**, 15333–15340.
- 8 Q. Zhang, G. Yi, Z. Fu, H. Yu, S. Chen and X. Quan, *ACS Nano*, 2019, **13**, 13196–13207.
- 9 Y. Yang, W. Que, J. Zhao, Y. Han, M. Ju and X. Yin, *Chem. Eng. J.*, 2019, **373**, 955–962.
- 10 Y. Yang, H. Zhao, Z. Yin, J. Zhao, X. Yin, N. Li, D. Yin, Y. Li, B. Lei, Y. Du and W. Que, *Mater.*

*Horiz.*, 2018, **5**, 1143-1150.

- 11 J. Chen, J. L. Yin, B. Li, Z. Ye, D. Liu, D. Ding, F. Qian, N. V. Myung, Q. Zhang, and Y. Yin, *ACS Nano*, 2020, **14**, 17419–17427.
- 12 Y. Chang, Z. Wang, Y.-e Shi, X. Ma, L. Ma, Y. Zhang and J. Zhan, *J. Mater. Chem. A*, 2018, **6**, 10939–10946.
- 13 S. Cheng, Z. Yu, Z. Lin, L. Li, Y. Li and Z. Mao, *Chem. Eng. J.*, 2020, **401**, 126108.
- 14 X. Ma, W. Fang, Y. Guo, Z. Li, D. Chen, W. Ying, Z. Xu, C. Gao and X. Peng, *Small*, 2019, **15**, 1900354.
- 15 Y. Yang, X. Yang, L. Fu, M. Zou, A. Cao, Y. Du, Q. Yuan and C.-H. Yan, *ACS Energy Lett.*, 2018, **3**, 1165–1171.
- 16 J. Zhao, Q. Huang, S. Ga, H. Piao, Q. Quan and C. Xiao, *J. Membr. Sci.*, 2021, **635**, 119500.
- 17 J. Huang, Y. Hu, Y. Bai, Y. He and J. Zhu, *Energy*, 2020, **211**, 118720.
- 18 W. Li, L. Deng, H. Huang, J. Zhou, Y. Liao, L. Qiu, H. Yang and L. Yao, *ACS Appl. Mater. Interfaces*, 2021, **13**, 26861–26869.
